# Supplementary material
Source: PubMed Central journal article supplement (PMC2804469)
Supplement: NIHMS168164-supplement-ESI_fig.pdf [file NIHMS168164-supplement-ESI_fig.pdf]

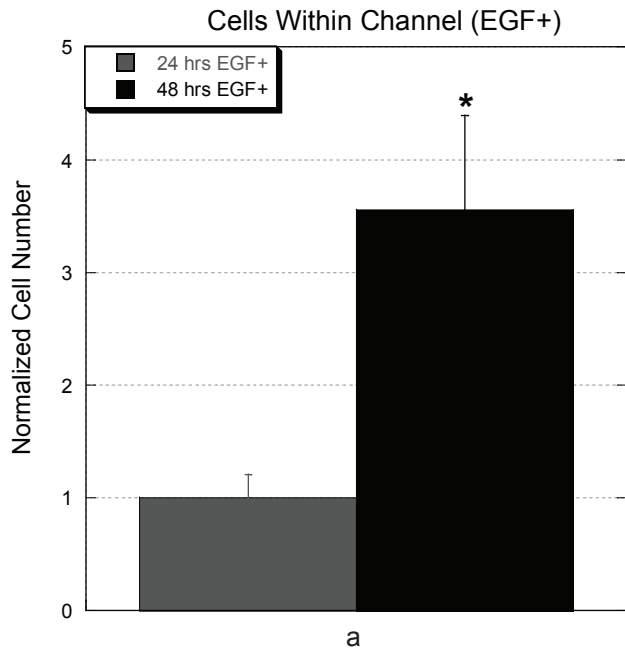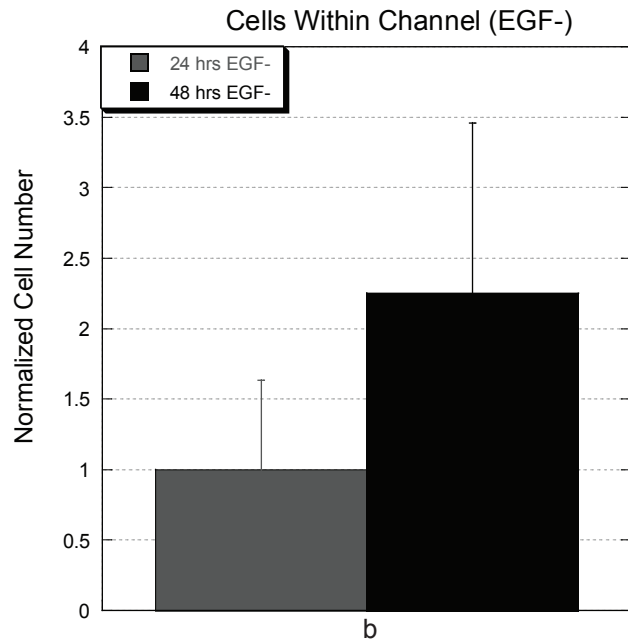

Supplementary Figure 1: Normalized cell numbers for stimulated and unstimulated conditions at 24 and 48 hour time points. a) The difference in cell number within the stimulated channels was statistically significant ( $P = 0.027$ ), while b) the difference in cell number within the unstimulated channels was not statistically significant ( $P = 0.388$ ).
